# Supplementary material for: Assessment of halotolerant bacterial and fungal consortia for augmentation of wheat in saline soils
Source: PubMed Central journal article supplement (PMC10347533; doi:10.3389/fmicb.2023.1207784), 2023-06-30
Supplement: Data_Sheet_2.pdf [file Data_Sheet_2.pdf]

**Supplementary Table 1: Isolation and purification of halotolerant bacterial strains from 17 sampling sites**

| Sr. No. | Isolates Initial Codes | Sampling site                      | Coordinates |           | Dilution factor    | LB media | LB supplemented with 1% NaCl |
|---------|------------------------|------------------------------------|-------------|-----------|--------------------|----------|------------------------------|
|         |                        |                                    | Latitude    | Longitude |                    |          |                              |
| 1       | KR1                    | Khewra Road                        | 32.6134     | 73.0239   | $1 \times 10^{-3}$ | ✓        | ✓                            |
| 2       | KR2                    | Khewra Road                        | 32.6134     | 73.0239   | $1 \times 10^{-3}$ | ✓        | ✓                            |
| 3       | KR3                    | Khewra Road                        | 32.6134     | 73.0239   | $1 \times 10^{-3}$ | ✓        | ✓                            |
| 4       | KR4                    | Khewra Road                        | 32.6134     | 73.0239   | $1 \times 10^{-3}$ | ✓        | ✓                            |
| 5       | KR5                    | Khewra Road                        | 32.6134     | 73.0239   | $1 \times 10^{-5}$ | ✓        | ✓                            |
| 6       | KR6                    | Khewra Road                        | 32.6134     | 73.0239   | $1 \times 10^{-3}$ | ✓        | ✓                            |
| 7       | CSKa1                  | Choa Saidan Shah-Kallar Kahar Road | 30.4319     | 71.9958   | $1 \times 10^{-3}$ | ✓        | ✓                            |
| 8       | CSKa2                  | Choa Saidan Shah-Kallar Kahar Road | 30.4319     | 71.9958   | $1 \times 10^{-3}$ | ✓        | ✓                            |
| 9       | CSKa3                  | Choa Saidan Shah-Kallar Kahar Road | 30.4319     | 71.9958   | $1 \times 10^{-3}$ | ✓        | ✓                            |
| 10      | CSKa4                  | Choa Saidan Shah-Kallar Kahar Road | 30.4319     | 71.9958   | $1 \times 10^{-3}$ | ✓        | ✓                            |
| 11      | CSKa5                  | Choa Saidan Shah-Kallar Kahar Road | 30.4319     | 71.9958   | $1 \times 10^{-3}$ | ✓        | ✓                            |
| 12      | CSKa6                  | Choa Saidan Shah-Kallar Kahar Road | 30.4319     | 71.9958   | $1 \times 10^{-5}$ | ✓        | ✓                            |
| 13      | CSKa7                  | Choa Saidan Shah-Kallar Kahar Road | 30.4319     | 71.9958   | $1 \times 10^{-5}$ | ✓        | ✓                            |
| 14      | CSKa8                  | Choa Saidan Shah-Kallar Kahar Road | 30.4319     | 71.9958   | $1 \times 10^{-5}$ | ✓        | ✓                            |
| 15      | CSKa9                  | Choa Saidan Shah-Kallar Kahar Road | 30.4319     | 71.9958   | $1 \times 10^{-5}$ | ✓        | ✓                            |
| 16      | CSKb1                  | Choa Saidan Shah-Kallar Kahar Road | 32.7664     | 72.7341   | $1 \times 10^{-3}$ | ✓        | ✓                            |
| 17      | CSKb2                  | Choa Saidan Shah-Kallar Kahar Road | 32.7664     | 72.7341   | $1 \times 10^{-3}$ | ✓        | ✓                            |
| 18      | CSKb3                  | Choa Saidan Shah-Kallar Kahar Road | 32.7664     | 72.7341   | $1 \times 10^{-3}$ | ✓        | ✓                            |
| 19      | CSKb4                  | Choa Saidan Shah-Kallar Kahar Road | 32.7664     | 72.7341   | $1 \times 10^{-5}$ | ✓        | ✓                            |

|           |              |                                           |                |               |                                      |   |   |
|-----------|--------------|-------------------------------------------|----------------|---------------|--------------------------------------|---|---|
| 20        | CSKb5        | Choa Saidan Shah-Kallar Kahar Road        | 32.7664        | 72.7341       | $1 \times 10^{-5}$                   | ✓ | ✓ |
| 21        | CSKb6        | Choa Saidan Shah-Kallar Kahar Road        | 32.7664        | 72.7341       | $1 \times 10^{-5}$                   | ✓ | ✓ |
| 22        | CSKb7        | Choa Saidan Shah-Kallar Kahar Road        | 32.7664        | 72.7341       | $1 \times 10^{-5}$                   | ✓ | ✓ |
| 23        | CSKb8        | Choa Saidan Shah-Kallar Kahar Road        | 32.7664        | 72.7341       | $1 \times 10^{-5}$                   | ✓ | ✓ |
| 24        | CSKc1        | Choa Saidan Shah-Kallar Kahar Road        | 32.7655        | 72.738        | $1 \times 10^{-3}$                   | ✓ | ✓ |
| 25        | CSKc2        | Choa Saidan Shah-Kallar Kahar Road        | 32.7655        | 72.738        | $1 \times 10^{-3}$                   | ✓ | ✓ |
| 26        | CSKc3        | Choa Saidan Shah-Kallar Kahar Road        | 32.7655        | 72.738        | $1 \times 10^{-3}$                   | ✓ | ✓ |
| 27        | CSKc4        | Choa Saidan Shah-Kallar Kahar Road        | 32.7655        | 72.738        | $1 \times 10^{-3}$                   | ✓ | ✓ |
| 28        | CSKc5        | Choa Saidan Shah-Kallar Kahar Road        | 32.7655        | 72.738        | $1 \times 10^{-3}$                   | ✓ | ✓ |
| 29        | CSKc6        | Choa Saidan Shah-Kallar Kahar Road        | 32.7655        | 72.738        | $1 \times 10^{-3}$                   | ✓ | ✓ |
| <b>30</b> | <b>CSKc7</b> | <b>Choa Saidan Shah-Kallar Kahar Road</b> | <b>32.7655</b> | <b>72.738</b> | <b><math>1 \times 10^{-5}</math></b> | ✓ | ✓ |
| 31        | CSKc8        | Choa Saidan Shah-Kallar Kahar Road        | 32.7655        | 72.738        | $1 \times 10^{-5}$                   | ✓ | ✓ |
| 32        | CSKc9        | Choa Saidan Shah-Kallar Kahar Road        | 32.7655        | 72.738        | $1 \times 10^{-5}$                   | ✓ | ✓ |
| 33        | CSKc10       | Choa Saidan Shah-Kallar Kahar Road        | 32.7655        | 72.738        | $1 \times 10^{-5}$                   | ✓ | ✓ |
| 34        | CSKd1        | Choa Saidan Shah-Kallar Kahar Road        | 32.7485        | 72.7574       | $1 \times 10^{-3}$                   | ✓ | ✓ |
| 35        | CSKd2        | Choa Saidan Shah-Kallar Kahar Road        | 32.7485        | 72.7574       | $1 \times 10^{-3}$                   | ✓ | ✓ |
| 36        | CSKd3        | Choa Saidan Shah-Kallar Kahar Road        | 32.7485        | 72.7574       | $1 \times 10^{-3}$                   | ✓ | ✓ |
| 37        | CSKd4        | Choa Saidan Shah-Kallar Kahar Road        | 32.7485        | 72.7574       | $1 \times 10^{-3}$                   | ✓ | ✓ |
| 38        | CSKd5        | Choa Saidan Shah-Kallar Kahar Road        | 32.7485        | 72.7574       | $1 \times 10^{-5}$                   | ✓ | ✓ |
| 39        | CSKd6        | Choa Saidan Shah-Kallar Kahar Road        | 32.7485        | 72.7574       | $1 \times 10^{-5}$                   | ✓ | ✓ |
| 40        | CSKd7        | Choa Saidan Shah-Kallar Kahar Road        | 32.7485        | 72.7574       | $1 \times 10^{-5}$                   | ✓ | ✓ |
| 41        | CSKd8        | Choa Saidan Shah-Kallar Kahar Road        | 32.7485        | 72.7574       | $1 \times 10^{-5}$                   | ✓ | ✓ |
| 42        | CSKd9        | Choa Saidan Shah-Kallar Kahar Road        | 32.7485        | 72.7574       | $1 \times 10^{-5}$                   | ✓ | ✓ |

|    |        |                                    |         |         |                    |   |   |
|----|--------|------------------------------------|---------|---------|--------------------|---|---|
| 43 | CSKd10 | Choa Saidan Shah-Kallar Kahar Road | 32.7485 | 72.7574 | $1 \times 10^{-5}$ | ✓ | ✓ |
| 44 | CSKd11 | Choa Saidan Shah-Kallar Kahar Road | 32.7485 | 72.7574 | $1 \times 10^{-5}$ | ✓ | ✓ |
| 45 | TKRa1  | Talagang-Kallar Kahar Road         | 32.7863 | 72.6968 | $1 \times 10^{-3}$ | ✓ | ✓ |
| 46 | TKRa2  | Talagang-Kallar Kahar Road         | 32.7863 | 72.6968 | $1 \times 10^{-3}$ | ✓ | ✓ |
| 47 | TKRa3  | Talagang-Kallar Kahar Road         | 32.7863 | 72.6968 | $1 \times 10^{-3}$ | ✓ | ✓ |
| 48 | TKRa4  | Talagang-Kallar Kahar Road         | 32.7863 | 72.6968 | $1 \times 10^{-3}$ | ✓ | ✓ |
| 49 | TKRa5  | Talagang-Kallar Kahar Road         | 32.7863 | 72.6968 | $1 \times 10^{-5}$ | ✓ | ✓ |
| 50 | TKRa6  | Talagang-Kallar Kahar Road         | 32.7863 | 72.6968 | $1 \times 10^{-5}$ | ✓ | ✓ |
| 51 | TKRa7  | Talagang-Kallar Kahar Road         | 32.7863 | 72.6968 | $1 \times 10^{-5}$ | ✓ | ✓ |
| 52 | TKRa8  | Talagang-Kallar Kahar Road         | 32.7863 | 72.6968 | $1 \times 10^{-5}$ | ✓ | ✓ |
| 53 | TKRa9  | Talagang-Kallar Kahar Road         | 32.7863 | 72.6968 | $1 \times 10^{-5}$ | ✓ | ✓ |
| 54 | TKRa10 | Talagang-Kallar Kahar Road         | 32.7863 | 72.6968 | $1 \times 10^{-5}$ | ✓ | ✓ |
| 55 | TKRa11 | Talagang-Kallar Kahar Road         | 32.7863 | 72.6968 | $1 \times 10^{-5}$ | ✓ | ✓ |
| 56 | TKRa12 | Talagang-Kallar Kahar Road         | 32.7863 | 72.6968 | $1 \times 10^{-5}$ | ✓ | ✓ |
| 57 | TKRb1  | Talagang-Kallar Kahar Road         | 32.7885 | 72.6823 | $1 \times 10^{-3}$ | ✓ | ✓ |
| 58 | TKRb2  | Talagang-Kallar Kahar Road         | 32.7885 | 72.6823 | $1 \times 10^{-3}$ | ✓ | ✓ |
| 59 | TKRb3  | Talagang-Kallar Kahar Road         | 32.7885 | 72.6823 | $1 \times 10^{-3}$ | ✓ | ✓ |
| 60 | TKRb4  | Talagang-Kallar Kahar Road         | 32.7885 | 72.6823 | $1 \times 10^{-3}$ | ✓ | ✓ |
| 61 | TKRb5  | Talagang-Kallar Kahar Road         | 32.7885 | 72.6823 | $1 \times 10^{-3}$ | ✓ | ✓ |
| 62 | TKRb6  | Talagang-Kallar Kahar Road         | 32.7885 | 72.6823 | $1 \times 10^{-3}$ | ✓ | ✓ |
| 63 | TKRb7  | Talagang-Kallar Kahar Road         | 32.7885 | 72.6823 | $1 \times 10^{-3}$ | ✓ | ✓ |
| 64 | TKRb8  | Talagang-Kallar Kahar Road         | 32.7885 | 72.6823 | $1 \times 10^{-3}$ | ✓ | ✓ |
| 65 | TKRb9  | Talagang-Kallar Kahar Road         | 32.7885 | 72.6823 | $1 \times 10^{-5}$ | ✓ | ✓ |

|    |        |                            |         |         |                    |   |   |
|----|--------|----------------------------|---------|---------|--------------------|---|---|
| 66 | TKRb10 | Talagang-Kallar Kahar Road | 32.7885 | 72.6823 | $1 \times 10^{-5}$ | ✓ | ✓ |
| 67 | TKRb11 | Talagang-Kallar Kahar Road | 32.7885 | 72.6823 | $1 \times 10^{-5}$ | ✓ | ✓ |
| 68 | LRa1   | Lillah Road                | 32.5791 | 72.8075 | $1 \times 10^{-3}$ | ✓ | ✓ |
| 69 | LRa2   | Lillah Road                | 32.5791 | 72.8075 | $1 \times 10^{-3}$ | ✓ | ✓ |
| 70 | LRa3   | Lillah Road                | 32.5791 | 72.8075 | $1 \times 10^{-3}$ | ✓ | ✓ |
| 71 | LRa4   | Lillah Road                | 32.5791 | 72.8075 | $1 \times 10^{-3}$ | ✓ | ✓ |
| 72 | LRa5   | Lillah Road                | 32.5791 | 72.8075 | $1 \times 10^{-3}$ | ✓ | ✓ |
| 73 | LRa6   | Lillah Road                | 32.5791 | 72.8075 | $1 \times 10^{-3}$ | ✓ | ✓ |
| 74 | LRa7   | Lillah Road                | 32.5791 | 72.8075 | $1 \times 10^{-5}$ | ✓ | ✓ |
| 75 | LRa8   | Lillah Road                | 32.5791 | 72.8075 | $1 \times 10^{-5}$ | ✓ | ✓ |
| 76 | LRa9   | Lillah Road                | 32.5791 | 72.8075 | $1 \times 10^{-5}$ | ✓ | ✓ |
| 77 | LRa10  | Lillah Road                | 32.5791 | 72.8075 | $1 \times 10^{-5}$ | ✓ | ✓ |
| 78 | LRa11  | Lillah Road                | 32.5791 | 72.8075 | $1 \times 10^{-5}$ | ✓ | ✓ |
| 79 | LRb1   | Lillah Road                | 32.5851 | 72.8931 | $1 \times 10^{-3}$ | ✓ | ✓ |
| 80 | LRb2   | Lillah Road                | 32.5851 | 72.8931 | $1 \times 10^{-3}$ | ✓ | ✓ |
| 81 | LRb3   | Lillah Road                | 32.5851 | 72.8931 | $1 \times 10^{-3}$ | ✓ | ✓ |
| 82 | LRb4   | Lillah Road                | 32.5851 | 72.8931 | $1 \times 10^{-3}$ | ✓ | ✓ |
| 83 | LRb5   | Lillah Road                | 32.5851 | 72.8931 | $1 \times 10^{-3}$ | ✓ | ✓ |
| 84 | LRb6   | Lillah Road                | 32.5851 | 72.8931 | $1 \times 10^{-3}$ | ✓ | ✓ |
| 85 | LRb7   | Lillah Road                | 32.5851 | 72.8931 | $1 \times 10^{-3}$ | ✓ | ✓ |
| 86 | LRb8   | Lillah Road                | 32.5851 | 72.8931 | $1 \times 10^{-3}$ | ✓ | ✓ |
| 87 | LRb9   | Lillah Road                | 32.5851 | 72.8931 | $1 \times 10^{-3}$ | ✓ | ✓ |
| 88 | LRb10  | Lillah Road                | 32.5851 | 72.8931 | $1 \times 10^{-3}$ | ✓ | ✓ |

|     |       |                           |         |          |                    |   |   |
|-----|-------|---------------------------|---------|----------|--------------------|---|---|
| 89  | LRb11 | Lillah Road               | 32.5851 | 72.8931  | $1 \times 10^{-5}$ | ✓ | ✓ |
| 90  | LRb12 | Lillah Road               | 32.5851 | 72.8931  | $1 \times 10^{-5}$ | ✓ | ✓ |
| 91  | LRb13 | Lillah Road               | 32.5851 | 72.8931  | $1 \times 10^{-5}$ | ✓ | ✓ |
| 92  | LRb14 | Lillah Road               | 32.5851 | 72.8931  | $1 \times 10^{-5}$ | ✓ | ✓ |
| 93  | LRb15 | Lillah Road               | 32.5851 | 72.8931  | $1 \times 10^{-5}$ | ✓ | ✓ |
| 94  | LRb16 | Lillah Road               | 32.5851 | 72.8931  | $1 \times 10^{-5}$ | ✓ | ✓ |
| 95  | LRc1  | Lillah Road               | 32.5936 | 73.027   | $1 \times 10^{-3}$ | ✓ | ✓ |
| 96  | LRc2  | Lillah Road               | 32.5936 | 73.027   | $1 \times 10^{-3}$ | ✓ | ✓ |
| 97  | LRc3  | Lillah Road               | 32.5936 | 73.027   | $1 \times 10^{-3}$ | ✓ | ✓ |
| 98  | LRc4  | Lillah Road               | 32.5936 | 73.027   | $1 \times 10^{-3}$ | ✓ | ✓ |
| 99  | LRc5  | Lillah Road               | 32.5936 | 73.027   | $1 \times 10^{-3}$ | ✓ | ✓ |
| 100 | LRc6  | Lillah Road               | 32.5936 | 73.027   | $1 \times 10^{-3}$ | ✓ | ✓ |
| 101 | LRc7  | Lillah Road               | 32.5936 | 73.027   | $1 \times 10^{-5}$ | ✓ | ✓ |
| 102 | LRc8  | Lillah Road               | 32.5936 | 73.027   | $1 \times 10^{-5}$ | ✓ | ✓ |
| 103 | LRc9  | Lillah Road               | 32.5936 | 73.027   | $1 \times 10^{-5}$ | ✓ | ✓ |
| 104 | LRc10 | Lillah Road               | 32.5936 | 73.027   | $1 \times 10^{-5}$ | ✓ | ✓ |
| 105 | LRc11 | Lillah Road               | 32.5936 | 73.027   | $1 \times 10^{-5}$ | ✓ | ✓ |
| 106 | LRc12 | Lillah Road               | 32.5936 | 73.027   | $1 \times 10^{-5}$ | ✓ | ✓ |
| 107 | LRc13 | Lillah Road               | 32.5936 | 73.027   | $1 \times 10^{-5}$ | ✓ | ✓ |
| 108 | LRc14 | Lillah Road               | 32.5936 | 73.027   | $1 \times 10^{-5}$ | ✓ | ✓ |
| 109 | LRc15 | Lillah Road               | 32.5936 | 73.027   | $1 \times 10^{-5}$ | ✓ | ✓ |
| 110 | GPB1  | Ghubrika, Pindi Bhattiyan | 31.8173 | 73.20805 | $1 \times 10^{-3}$ | ✓ | ✓ |
| 111 | GPB2  | Ghubrika, Pindi Bhattiyan | 31.8173 | 73.20805 | $1 \times 10^{-3}$ | ✓ | ✓ |

|     |       |                           |         |          |                    |   |   |
|-----|-------|---------------------------|---------|----------|--------------------|---|---|
| 112 | GPB3  | Ghubrika, Pindi Bhattiyan | 31.8173 | 73.20805 | $1 \times 10^{-3}$ | ✓ | ✓ |
| 113 | GPB4  | Ghubrika, Pindi Bhattiyan | 31.8173 | 73.20805 | $1 \times 10^{-3}$ | ✓ | ✓ |
| 114 | GPB5  | Ghubrika, Pindi Bhattiyan | 31.8173 | 73.20805 | $1 \times 10^{-3}$ | ✓ | ✓ |
| 115 | GPB6  | Ghubrika, Pindi Bhattiyan | 31.8173 | 73.20805 | $1 \times 10^{-3}$ | ✓ | ✓ |
| 116 | GPB7  | Ghubrika, Pindi Bhattiyan | 31.8173 | 73.20805 | $1 \times 10^{-3}$ | ✓ | ✓ |
| 117 | GPB8  | Ghubrika, Pindi Bhattiyan | 31.8173 | 73.20805 | $1 \times 10^{-3}$ | ✓ | ✓ |
| 118 | GPB9  | Ghubrika, Pindi Bhattiyan | 31.8173 | 73.20805 | $1 \times 10^{-3}$ | ✓ | ✓ |
| 119 | GPB10 | Ghubrika, Pindi Bhattiyan | 31.8173 | 73.20805 | $1 \times 10^{-3}$ | ✓ | ✓ |
| 120 | GPB11 | Ghubrika, Pindi Bhattiyan | 31.8173 | 73.20805 | $1 \times 10^{-3}$ | ✓ | ✓ |
| 121 | GPB12 | Ghubrika, Pindi Bhattiyan | 31.8173 | 73.20805 | $1 \times 10^{-3}$ | ✓ | ✓ |
| 122 | GPB13 | Ghubrika, Pindi Bhattiyan | 31.8173 | 73.20805 | $1 \times 10^{-5}$ | ✓ | ✓ |
| 123 | GPB14 | Ghubrika, Pindi Bhattiyan | 31.8173 | 73.20805 | $1 \times 10^{-5}$ | ✓ | ✓ |
| 124 | GPB15 | Ghubrika, Pindi Bhattiyan | 31.8173 | 73.20805 | $1 \times 10^{-5}$ | ✓ | ✓ |
| 125 | GPB16 | Ghubrika, Pindi Bhattiyan | 31.8173 | 73.20805 | $1 \times 10^{-5}$ | ✓ | ✓ |
| 126 | GPB17 | Ghubrika, Pindi Bhattiyan | 31.8173 | 73.20805 | $1 \times 10^{-5}$ | ✓ | ✓ |
| 127 | GPB18 | Ghubrika, Pindi Bhattiyan | 31.8173 | 73.20805 | $1 \times 10^{-5}$ | ✓ | ✓ |
| 128 | GPB19 | Ghubrika, Pindi Bhattiyan | 31.8173 | 73.20805 | $1 \times 10^{-5}$ | ✓ | ✓ |
| 129 | GPB20 | Ghubrika, Pindi Bhattiyan | 31.8173 | 73.20805 | $1 \times 10^{-5}$ | ✓ | ✓ |
| 130 | GPB21 | Ghubrika, Pindi Bhattiyan | 31.8173 | 73.20805 | $1 \times 10^{-5}$ | ✓ | ✓ |
| 131 | BWC1  | Burjian Wala, Chiniot     | 31.8055 | 73.1547  | $1 \times 10^{-3}$ | ✓ | ✓ |
| 132 | BWC2  | Burjian Wala, Chiniot     | 31.8055 | 73.1547  | $1 \times 10^{-3}$ | ✓ | ✓ |
| 133 | BWC3  | Burjian Wala, Chiniot     | 31.8055 | 73.1547  | $1 \times 10^{-3}$ | ✓ | ✓ |
| 134 | BWC4  | Burjian Wala, Chiniot     | 31.8055 | 73.1547  | $1 \times 10^{-3}$ | ✓ | ✓ |

|     |       |                       |         |         |                    |   |   |
|-----|-------|-----------------------|---------|---------|--------------------|---|---|
| 135 | BWC5  | Burjian Wala, Chiniot | 31.8055 | 73.1547 | $1 \times 10^{-3}$ | ✓ | ✓ |
| 136 | BWC6  | Burjian Wala, Chiniot | 31.8055 | 73.1547 | $1 \times 10^{-3}$ | ✓ | ✓ |
| 137 | BWC7  | Burjian Wala, Chiniot | 31.8055 | 73.1547 | $1 \times 10^{-3}$ | ✓ | ✓ |
| 138 | BWC8  | Burjian Wala, Chiniot | 31.8055 | 73.1547 | $1 \times 10^{-3}$ | ✓ | ✓ |
| 139 | BWC9  | Burjian Wala, Chiniot | 31.8055 | 73.1547 | $1 \times 10^{-3}$ | ✓ | ✓ |
| 140 | BWC10 | Burjian Wala, Chiniot | 31.8055 | 73.1547 | $1 \times 10^{-3}$ | ✓ | ✓ |
| 141 | BWC11 | Burjian Wala, Chiniot | 31.8055 | 73.1547 | $1 \times 10^{-3}$ | ✓ | ✓ |
| 142 | BWC12 | Burjian Wala, Chiniot | 31.8055 | 73.1547 | $1 \times 10^{-3}$ | ✓ | ✓ |
| 143 | BWC13 | Burjian Wala, Chiniot | 31.8055 | 73.1547 | $1 \times 10^{-3}$ | ✓ | ✓ |
| 144 | BWC14 | Burjian Wala, Chiniot | 31.8055 | 73.1547 | $1 \times 10^{-3}$ | ✓ | ✓ |
| 145 | BWC15 | Burjian Wala, Chiniot | 31.8055 | 73.1547 | $1 \times 10^{-5}$ | ✓ | ✓ |
| 146 | BWC16 | Burjian Wala, Chiniot | 31.8055 | 73.1547 | $1 \times 10^{-5}$ | ✓ | ✓ |
| 147 | BWC17 | Burjian Wala, Chiniot | 31.8055 | 73.1547 | $1 \times 10^{-5}$ | ✓ | ✓ |
| 148 | BWC18 | Burjian Wala, Chiniot | 31.8055 | 73.1547 | $1 \times 10^{-5}$ | ✓ | ✓ |
| 149 | BWC19 | Burjian Wala, Chiniot | 31.8055 | 73.1547 | $1 \times 10^{-5}$ | ✓ | ✓ |
| 150 | BWC20 | Burjian Wala, Chiniot | 31.8055 | 73.1547 | $1 \times 10^{-5}$ | ✓ | ✓ |
| 151 | BWC21 | Burjian Wala, Chiniot | 31.8055 | 73.1547 | $1 \times 10^{-5}$ | ✓ | ✓ |
| 152 | BWC22 | Burjian Wala, Chiniot | 31.8055 | 73.1547 | $1 \times 10^{-5}$ | ✓ | ✓ |
| 153 | BWC23 | Burjian Wala, Chiniot | 31.8055 | 73.1547 | $1 \times 10^{-5}$ | ✓ | ✓ |
| 154 | TTS1  | Toba Tek Singh        | 30.9558 | 72.4766 | $1 \times 10^{-3}$ | ✓ | ✓ |
| 155 | TTS2  | Toba Tek Singh        | 30.9558 | 72.4766 | $1 \times 10^{-3}$ | ✓ | ✓ |
| 156 | TTS3  | Toba Tek Singh        | 30.9558 | 72.4766 | $1 \times 10^{-3}$ | ✓ | ✓ |
| 157 | TTS4  | Toba Tek Singh        | 30.9558 | 72.4766 | $1 \times 10^{-3}$ | ✓ | ✓ |

|     |       |                |         |         |                    |   |   |
|-----|-------|----------------|---------|---------|--------------------|---|---|
| 158 | TTS5  | Toba Tek Singh | 30.9558 | 72.4766 | $1 \times 10^{-3}$ | ✓ | ✓ |
| 159 | TTS6  | Toba Tek Singh | 30.9558 | 72.4766 | $1 \times 10^{-3}$ | ✓ | ✓ |
| 160 | TTS7  | Toba Tek Singh | 30.9558 | 72.4766 | $1 \times 10^{-3}$ | ✓ | ✓ |
| 161 | TTS8  | Toba Tek Singh | 30.9558 | 72.4766 | $1 \times 10^{-3}$ | ✓ | ✓ |
| 162 | TTS9  | Toba Tek Singh | 30.9558 | 72.4766 | $1 \times 10^{-3}$ | ✓ | ✓ |
| 163 | TTS10 | Toba Tek Singh | 30.9558 | 72.4766 | $1 \times 10^{-3}$ | ✓ | ✓ |
| 164 | TTS11 | Toba Tek Singh | 30.9558 | 72.4766 | $1 \times 10^{-3}$ | ✓ | ✓ |
| 165 | TTS12 | Toba Tek Singh | 30.9558 | 72.4766 | $1 \times 10^{-3}$ | ✓ | ✓ |
| 166 | TTS13 | Toba Tek Singh | 30.9558 | 72.4766 | $1 \times 10^{-3}$ | ✓ | ✓ |
| 167 | TTS14 | Toba Tek Singh | 30.9558 | 72.4766 | $1 \times 10^{-3}$ | ✓ | ✓ |
| 168 | TTS15 | Toba Tek Singh | 30.9558 | 72.4766 | $1 \times 10^{-3}$ | ✓ | ✓ |
| 169 | TTS16 | Toba Tek Singh | 30.9558 | 72.4766 | $1 \times 10^{-3}$ | ✓ | ✓ |
| 170 | TTS17 | Toba Tek Singh | 30.9558 | 72.4766 | $1 \times 10^{-5}$ | ✓ | ✓ |
| 171 | TTS18 | Toba Tek Singh | 30.9558 | 72.4766 | $1 \times 10^{-5}$ | ✓ | ✓ |
| 172 | TTS19 | Toba Tek Singh | 30.9558 | 72.4766 | $1 \times 10^{-5}$ | ✓ | ✓ |
| 173 | TTS20 | Toba Tek Singh | 30.9558 | 72.4766 | $1 \times 10^{-5}$ | ✓ | ✓ |
| 174 | TTS21 | Toba Tek Singh | 30.9558 | 72.4766 | $1 \times 10^{-5}$ | ✓ | ✓ |
| 175 | TTS22 | Toba Tek Singh | 30.9558 | 72.4766 | $1 \times 10^{-5}$ | ✓ | ✓ |
| 176 | Dw1   | Dolu-Wala      | 31.8026 | 73.1768 | $1 \times 10^{-3}$ | ✓ | ✓ |
| 177 | Dw2   | Dolu-Wala      | 31.8026 | 73.1768 | $1 \times 10^{-3}$ | ✓ | ✓ |
| 178 | Dw3   | Dolu-Wala      | 31.8026 | 73.1768 | $1 \times 10^{-3}$ | ✓ | ✓ |
| 179 | Dw4   | Dolu-Wala      | 31.8026 | 73.1768 | $1 \times 10^{-3}$ | ✓ | ✓ |
| 180 | Dw5   | Dolu-Wala      | 31.8026 | 73.1768 | $1 \times 10^{-3}$ | ✓ | ✓ |



|     |      |            |         |         |                    |   |   |
|-----|------|------------|---------|---------|--------------------|---|---|
| 181 | Dw6  | Dolu-Wala  | 31.8026 | 73.1768 | $1 \times 10^{-3}$ | ✓ | ✓ |
| 182 | Dw7  | Dolu-Wala  | 31.8026 | 73.1768 | $1 \times 10^{-3}$ | ✓ | ✓ |
| 183 | Dw8  | Dolu-Wala  | 31.8026 | 73.1768 | $1 \times 10^{-3}$ | ✓ | ✓ |
| 184 | Dw9  | Dolu-Wala  | 31.8026 | 73.1768 | $1 \times 10^{-3}$ | ✓ | ✓ |
| 185 | Dw10 | Dolu-Wala  | 31.8026 | 73.1768 | $1 \times 10^{-5}$ | ✓ | ✓ |
| 186 | Dw11 | Dolu-Wala  | 31.8026 | 73.1768 | $1 \times 10^{-5}$ | ✓ | ✓ |
| 187 | Dw12 | Dolu-Wala  | 31.8026 | 73.1768 | $1 \times 10^{-5}$ | ✓ | ✓ |
| 188 | Dw13 | Dolu-Wala  | 31.8026 | 73.1768 | $1 \times 10^{-5}$ | ✓ | ✓ |
| 189 | Dw14 | Dolu-Wala  | 31.8026 | 73.1768 | $1 \times 10^{-5}$ | ✓ | ✓ |
| 190 | Dw15 | Dolu-Wala  | 31.8026 | 73.1768 | $1 \times 10^{-5}$ | ✓ | ✓ |
| 191 | Dw16 | Dolu-Wala  | 31.8026 | 73.1768 | $1 \times 10^{-5}$ | ✓ | ✓ |
| 192 | Dw17 | Dolu-Wala  | 31.8026 | 73.1768 | $1 \times 10^{-5}$ | ✓ | ✓ |
| 193 | Dw18 | Dolu-Wala  | 31.8026 | 73.1768 | $1 \times 10^{-5}$ | ✓ | ✓ |
| 194 | PA1  | Pakka Anna | 31.2455 | 72.7981 | $1 \times 10^{-3}$ | ✓ | ✓ |
| 195 | PA2  | Pakka Anna | 31.2455 | 72.7981 | $1 \times 10^{-3}$ | ✓ | ✓ |
| 196 | PA3  | Pakka Anna | 31.2455 | 72.7981 | $1 \times 10^{-3}$ | ✓ | ✓ |
| 197 | PA4  | Pakka Anna | 31.2455 | 72.7981 | $1 \times 10^{-3}$ | ✓ | ✓ |
| 198 | PA5  | Pakka Anna | 31.2455 | 72.7981 | $1 \times 10^{-3}$ | ✓ | ✓ |
| 199 | PA6  | Pakka Anna | 31.2455 | 72.7981 | $1 \times 10^{-3}$ | ✓ | ✓ |
| 200 | PA7  | Pakka Anna | 31.2455 | 72.7981 | $1 \times 10^{-3}$ | ✓ | ✓ |
| 201 | PA8  | Pakka Anna | 31.2455 | 72.7981 | $1 \times 10^{-3}$ | ✓ | ✓ |
| 202 | PA9  | Pakka Anna | 31.2455 | 72.7981 | $1 \times 10^{-3}$ | ✓ | ✓ |
| 203 | PA10 | Pakka Anna | 31.2455 | 72.7981 | $1 \times 10^{-3}$ | ✓ | ✓ |

|     |      |            |         |         |                    |   |   |
|-----|------|------------|---------|---------|--------------------|---|---|
| 204 | PA11 | Pakka Anna | 31.2455 | 72.7981 | $1 \times 10^{-3}$ | ✓ | ✓ |
| 205 | PA12 | Pakka Anna | 31.2455 | 72.7981 | $1 \times 10^{-3}$ | ✓ | ✓ |
| 206 | PA13 | Pakka Anna | 31.2455 | 72.7981 | $1 \times 10^{-3}$ | ✓ | ✓ |
| 207 | PA14 | Pakka Anna | 31.2455 | 72.7981 | $1 \times 10^{-3}$ | ✓ | ✓ |
| 208 | PA15 | Pakka Anna | 31.2455 | 72.7981 | $1 \times 10^{-5}$ | ✓ | ✓ |
| 209 | PA16 | Pakka Anna | 31.2455 | 72.7981 | $1 \times 10^{-5}$ | ✓ | ✓ |
| 210 | PA17 | Pakka Anna | 31.2455 | 72.7981 | $1 \times 10^{-5}$ | ✓ | ✓ |
| 211 | PA18 | Pakka Anna | 31.2455 | 72.7981 | $1 \times 10^{-5}$ | ✓ | ✓ |
| 212 | PA19 | Pakka Anna | 31.2455 | 72.7981 | $1 \times 10^{-5}$ | ✓ | ✓ |
| 213 | PA20 | Pakka Anna | 31.2455 | 72.7981 | $1 \times 10^{-5}$ | ✓ | ✓ |
| 214 | PA21 | Pakka Anna | 31.2455 | 72.7981 | $1 \times 10^{-5}$ | ✓ | ✓ |
| 215 | PA22 | Pakka Anna | 31.2455 | 72.7981 | $1 \times 10^{-5}$ | ✓ | ✓ |
| 216 | PA23 | Pakka Anna | 31.2455 | 72.7981 | $1 \times 10^{-5}$ | ✓ | ✓ |
| 217 | PA24 | Pakka Anna | 31.2455 | 72.7981 | $1 \times 10^{-5}$ | ✓ | ✓ |
| 218 | PA25 | Pakka Anna | 31.2455 | 72.7981 | $1 \times 10^{-5}$ | ✓ | ✓ |
| 219 | PA26 | Pakka Anna | 31.2455 | 72.7981 | $1 \times 10^{-5}$ | ✓ | ✓ |
| 220 | PA27 | Pakka Anna | 31.2455 | 72.7981 | $1 \times 10^{-5}$ | ✓ | ✓ |
| 221 | PA28 | Pakka Anna | 31.2455 | 72.7981 | $1 \times 10^{-5}$ | ✓ | ✓ |
| 222 | PA29 | Pakka Anna | 31.2455 | 72.7981 | $1 \times 10^{-5}$ | ✓ | ✓ |
| 223 | PA30 | Pakka Anna | 31.2455 | 72.7981 | $1 \times 10^{-5}$ | ✓ | ✓ |
| 224 | PA31 | Pakka Anna | 31.2455 | 72.7981 | $1 \times 10^{-5}$ | ✓ | ✓ |
| 225 | PA32 | Pakka Anna | 31.2455 | 72.7981 | $1 \times 10^{-5}$ | ✓ | ✓ |
| 226 | PA33 | Pakka Anna | 31.2455 | 72.7981 | $1 \times 10^{-5}$ | ✓ | ✓ |

|     |       |                     |         |         |                    |   |   |
|-----|-------|---------------------|---------|---------|--------------------|---|---|
| 227 | PA34  | Pakka Anna          | 31.2455 | 72.7981 | $1 \times 10^{-5}$ | ✓ | ✓ |
| 228 | PA35  | Pakka Anna          | 31.2455 | 72.7981 | $1 \times 10^{-5}$ | ✓ | ✓ |
| 229 | PA36  | Pakka Anna          | 31.2455 | 72.7981 | $1 \times 10^{-5}$ | ✓ | ✓ |
| 230 | PA37  | Pakka Anna          | 31.2455 | 72.7981 | $1 \times 10^{-5}$ | ✓ | ✓ |
| 231 | DLG1  | Dad Leghari, Ghotki | 27.9474 | 69.6663 | $1 \times 10^{-3}$ | ✓ | ✓ |
| 232 | DLG2  | Dad Leghari, Ghotki | 27.9474 | 69.6663 | $1 \times 10^{-3}$ | ✓ | ✓ |
| 233 | DLG3  | Dad Leghari, Ghotki | 27.9474 | 69.6663 | $1 \times 10^{-3}$ | ✓ | ✓ |
| 234 | DLG4  | Dad Leghari, Ghotki | 27.9474 | 69.6663 | $1 \times 10^{-3}$ | ✓ | ✓ |
| 235 | DLG5  | Dad Leghari, Ghotki | 27.9474 | 69.6663 | $1 \times 10^{-3}$ | ✓ | ✓ |
| 236 | DLG6  | Dad Leghari, Ghotki | 27.9474 | 69.6663 | $1 \times 10^{-3}$ | ✓ | ✓ |
| 237 | DLG7  | Dad Leghari, Ghotki | 27.9474 | 69.6663 | $1 \times 10^{-3}$ | ✓ | ✓ |
| 238 | DLG8  | Dad Leghari, Ghotki | 27.9474 | 69.6663 | $1 \times 10^{-3}$ | ✓ | ✓ |
| 239 | DLG9  | Dad Leghari, Ghotki | 27.9474 | 69.6663 | $1 \times 10^{-3}$ | ✓ | ✓ |
| 240 | DLG10 | Dad Leghari, Ghotki | 27.9474 | 69.6663 | $1 \times 10^{-3}$ | ✓ | ✓ |
| 241 | DLG11 | Dad Leghari, Ghotki | 27.9474 | 69.6663 | $1 \times 10^{-3}$ | ✓ | ✓ |
| 242 | DLG12 | Dad Leghari, Ghotki | 27.9474 | 69.6663 | $1 \times 10^{-3}$ | ✓ | ✓ |
| 243 | DLG13 | Dad Leghari, Ghotki | 27.9474 | 69.6663 | $1 \times 10^{-3}$ | ✓ | ✓ |
| 244 | DLG14 | Dad Leghari, Ghotki | 27.9474 | 69.6663 | $1 \times 10^{-3}$ | ✓ | ✓ |
| 245 | DLG15 | Dad Leghari, Ghotki | 27.9474 | 69.6663 | $1 \times 10^{-3}$ | ✓ | ✓ |
| 246 | DLG16 | Dad Leghari, Ghotki | 27.9474 | 69.6663 | $1 \times 10^{-3}$ | ✓ | ✓ |
| 247 | DLG17 | Dad Leghari, Ghotki | 27.9474 | 69.6663 | $1 \times 10^{-5}$ | ✓ | ✓ |
| 248 | DLG18 | Dad Leghari, Ghotki | 27.9474 | 69.6663 | $1 \times 10^{-5}$ | ✓ | ✓ |
| 249 | DLG19 | Dad Leghari, Ghotki | 27.9474 | 69.6663 | $1 \times 10^{-5}$ | ✓ | ✓ |

|     |       |                      |         |         |                    |   |   |
|-----|-------|----------------------|---------|---------|--------------------|---|---|
| 250 | DLG20 | Dad Leghari, Ghotki  | 27.9474 | 69.6663 | $1 \times 10^{-5}$ | ✓ | ✓ |
| 251 | DLG21 | Dad Leghari, Ghotki  | 27.9474 | 69.6663 | $1 \times 10^{-5}$ | ✓ | ✓ |
| 252 | DLG22 | Dad Leghari, Ghotki  | 27.9474 | 69.6663 | $1 \times 10^{-5}$ | ✓ | ✓ |
| 253 | DLG23 | Dad Leghari, Ghotki  | 27.9474 | 69.6663 | $1 \times 10^{-5}$ | ✓ | ✓ |
| 254 | DLG24 | Dad Leghari, Ghotki  | 27.9474 | 69.6663 | $1 \times 10^{-5}$ | ✓ | ✓ |
| 255 | DLG25 | Dad Leghari, Ghotki  | 27.9474 | 69.6663 | $1 \times 10^{-5}$ | ✓ | ✓ |
| 256 | DLG26 | Dad Leghari, Ghotki  | 27.9474 | 69.6663 | $1 \times 10^{-5}$ | ✓ | ✓ |
| 257 | DLG27 | Dad Leghari, Ghotki  | 27.9474 | 69.6663 | $1 \times 10^{-5}$ | ✓ | ✓ |
| 258 | DLG28 | Dad Leghari, Ghotki  | 27.9474 | 69.6663 | $1 \times 10^{-5}$ | ✓ | ✓ |
| 259 | DLG29 | Dad Leghari, Ghotki  | 27.9474 | 69.6663 | $1 \times 10^{-5}$ | ✓ | ✓ |
| 260 | DLG30 | Dad Leghari, Ghotki  | 27.9474 | 69.6663 | $1 \times 10^{-5}$ | ✓ | ✓ |
| 261 | DLG31 | Dad Leghari, Ghotki  | 27.9474 | 69.6663 | $1 \times 10^{-5}$ | ✓ | ✓ |
| 262 | DLG32 | Dad Leghari, Ghotki  | 27.9474 | 69.6663 | $1 \times 10^{-5}$ | ✓ | ✓ |
| 263 | DLG33 | Dad Leghari, Ghotki  | 27.9474 | 69.6663 | $1 \times 10^{-5}$ | ✓ | ✓ |
| 264 | DLG34 | Dad Leghari, Ghotki  | 27.9474 | 69.6663 | $1 \times 10^{-5}$ | ✓ | ✓ |
| 265 | BBD1  | Bago Bhutto, Daharki | 28.0403 | 69.6561 | $1 \times 10^{-3}$ | ✓ | ✓ |
| 266 | BBD2  | Bago Bhutto, Daharki | 28.0403 | 69.6561 | $1 \times 10^{-3}$ | ✓ | ✓ |
| 267 | BBD3  | Bago Bhutto, Daharki | 28.0403 | 69.6561 | $1 \times 10^{-3}$ | ✓ | ✓ |
| 268 | BBD4  | Bago Bhutto, Daharki | 28.0403 | 69.6561 | $1 \times 10^{-3}$ | ✓ | ✓ |
| 269 | BBD5  | Bago Bhutto, Daharki | 28.0403 | 69.6561 | $1 \times 10^{-3}$ | ✓ | ✓ |
| 270 | BBD6  | Bago Bhutto, Daharki | 28.0403 | 69.6561 | $1 \times 10^{-3}$ | ✓ | ✓ |
| 271 | BBD7  | Bago Bhutto, Daharki | 28.0403 | 69.6561 | $1 \times 10^{-3}$ | ✓ | ✓ |
| 272 | BBD8  | Bago Bhutto, Daharki | 28.0403 | 69.6561 | $1 \times 10^{-3}$ | ✓ | ✓ |

|     |       |                      |         |         |                    |   |   |
|-----|-------|----------------------|---------|---------|--------------------|---|---|
| 273 | BBD9  | Bago Bhutto, Daharki | 28.0403 | 69.6561 | $1 \times 10^{-3}$ | ✓ | ✓ |
| 274 | BBD10 | Bago Bhutto, Daharki | 28.0403 | 69.6561 | $1 \times 10^{-3}$ | ✓ | ✓ |
| 275 | BBD11 | Bago Bhutto, Daharki | 28.0403 | 69.6561 | $1 \times 10^{-3}$ | ✓ | ✓ |
| 276 | BBD12 | Bago Bhutto, Daharki | 28.0403 | 69.6561 | $1 \times 10^{-3}$ | ✓ | ✓ |
| 277 | BBD13 | Bago Bhutto, Daharki | 28.0403 | 69.6561 | $1 \times 10^{-3}$ | ✓ | ✓ |
| 278 | BBD14 | Bago Bhutto, Daharki | 28.0403 | 69.6561 | $1 \times 10^{-3}$ | ✓ | ✓ |
| 279 | BBD15 | Bago Bhutto, Daharki | 28.0403 | 69.6561 | $1 \times 10^{-3}$ | ✓ | ✓ |
| 280 | BBD16 | Bago Bhutto, Daharki | 28.0403 | 69.6561 | $1 \times 10^{-3}$ | ✓ | ✓ |
| 281 | BBD17 | Bago Bhutto, Daharki | 28.0403 | 69.6561 | $1 \times 10^{-3}$ | ✓ | ✓ |
| 282 | BBD18 | Bago Bhutto, Daharki | 28.0403 | 69.6561 | $1 \times 10^{-3}$ | ✓ | ✓ |
| 283 | BBD19 | Bago Bhutto, Daharki | 28.0403 | 69.6561 | $1 \times 10^{-3}$ | ✓ | ✓ |
| 284 | BBD20 | Bago Bhutto, Daharki | 28.0403 | 69.6561 | $1 \times 10^{-3}$ | ✓ | ✓ |
| 285 | BBD21 | Bago Bhutto, Daharki | 28.0403 | 69.6561 | $1 \times 10^{-5}$ | ✓ | ✓ |
| 286 | BBD22 | Bago Bhutto, Daharki | 28.0403 | 69.6561 | $1 \times 10^{-5}$ | ✓ | ✓ |
| 287 | BBD23 | Bago Bhutto, Daharki | 28.0403 | 69.6561 | $1 \times 10^{-5}$ | ✓ | ✓ |
| 288 | BBD24 | Bago Bhutto, Daharki | 28.0403 | 69.6561 | $1 \times 10^{-5}$ | ✓ | ✓ |
| 289 | BBD25 | Bago Bhutto, Daharki | 28.0403 | 69.6561 | $1 \times 10^{-5}$ | ✓ | ✓ |
| 290 | BBD26 | Bago Bhutto, Daharki | 28.0403 | 69.6561 | $1 \times 10^{-5}$ | ✓ | ✓ |
| 291 | BBD27 | Bago Bhutto, Daharki | 28.0403 | 69.6561 | $1 \times 10^{-5}$ | ✓ | ✓ |
| 292 | BBD28 | Bago Bhutto, Daharki | 28.0403 | 69.6561 | $1 \times 10^{-5}$ | ✓ | ✓ |
| 293 | BBD29 | Bago Bhutto, Daharki | 28.0403 | 69.6561 | $1 \times 10^{-5}$ | ✓ | ✓ |
| 294 | BBD30 | Bago Bhutto, Daharki | 28.0403 | 69.6561 | $1 \times 10^{-5}$ | ✓ | ✓ |
| 295 | BBD31 | Bago Bhutto, Daharki | 28.0403 | 69.6561 | $1 \times 10^{-5}$ | ✓ | ✓ |

|     |       |                      |         |         |                    |   |   |
|-----|-------|----------------------|---------|---------|--------------------|---|---|
| 296 | BBD32 | Bago Bhutto, Daharki | 28.0403 | 69.6561 | $1 \times 10^{-5}$ | ✓ | ✓ |
| 297 | BBD33 | Bago Bhutto, Daharki | 28.0403 | 69.6561 | $1 \times 10^{-5}$ | ✓ | ✓ |

**Supplementary Table 2: Determination of minimum inhibitory concentration (MIC) for NaCl of bacterial isolates on salt supplemented media**

| Sr. No. | Isolates Initial Code | Final Code | LB media (0.5% NaCl) | 1% NaCl | 5% NaCl | 7% NaCl | 10% NaCl |
|---------|-----------------------|------------|----------------------|---------|---------|---------|----------|
| 1       | CSKa1                 | UM1        | ✓                    | ✓       | ✓       | ✓       | ×        |
| 2       | CSKa2                 | UM2        | ✓                    | ✓       | ✓       | ✓       | ✓        |
| 3       | CSKa3                 |            | ✓                    | ✓       | ×       | ×       | ×        |
| 4       | CSKa4                 | UM3        | ✓                    | ✓       | ✓       | ✓       | ×        |
| 5       | CSKa5                 |            | ✓                    | ✓       | ×       | ×       | ×        |
| 6       | CSKa6                 | UM4        | ✓                    | ✓       | ✓       | ✓       | ✓        |
| 7       | CSKa7                 |            | ✓                    | ✓       | ✓       | ×       | ×        |
| 8       | CSKa8                 | UM5        | ✓                    | ✓       | ✓       | ✓       | ✓        |
| 9       | CSKa9                 | UM5        | ✓                    | ✓       | ✓       | ✓       | ✓        |
| 10      | KR1                   | UM6        | ✓                    | ✓       | ✓       | ✓       | ✓        |
| 11      | KR2                   |            | ✓                    | ✓       | ×       | ×       | ×        |
| 12      | KR3                   |            | ✓                    | ✓       | ✓       | ×       | ×        |
| 13      | KR4                   | UM7        | ✓                    | ✓       | ✓       | ✓       | ×        |
| 14      | KR5                   |            | ✓                    | ✓       | ×       | ×       | ×        |
| 15      | KR6                   | UM8        | ✓                    | ✓       | ✓       | ✓       | ✓        |
| 16      | CSKb1                 | UM9        | ✓                    | ✓       | ✓       | ✓       | ✓        |
| 17      | CSKb2                 |            | ✓                    | ✓       | ×       | ×       | ×        |
| 18      | CSKb3                 | UM10       | ✓                    | ✓       | ✓       | ✓       | ×        |
| 19      | CSKb4                 |            | ✓                    | ✓       | ×       | ×       | ×        |
| 20      | CSKb5                 |            | ✓                    | ✓       | ✓       | ×       | ×        |

|    |        |      |   |   |   |   |   |
|----|--------|------|---|---|---|---|---|
| 21 | CSKb6  | UM11 | ✓ | ✓ | ✓ | ✓ | ✓ |
| 22 | CSKb7  |      | ✓ | ✓ | × | × | × |
| 23 | CSKb8  |      | ✓ | ✓ | × | × | × |
| 24 | CSKc1  | UM12 | ✓ | ✓ | ✓ | ✓ | × |
| 25 | CSKc2  | UM13 | ✓ | ✓ | ✓ | ✓ | ✓ |
| 26 | CSKc3  | UM14 | ✓ | ✓ | ✓ | ✓ | ✓ |
| 27 | CSKc4  | UM15 | ✓ | ✓ | ✓ | ✓ | ✓ |
| 28 | CSKc5  |      | ✓ | ✓ | ✓ | × | × |
| 29 | CSKc6  |      | ✓ | ✓ | ✓ | × | × |
| 30 | CSKc7  | UM16 | ✓ | ✓ | ✓ | ✓ | ✓ |
| 31 | CSKc8  |      | ✓ | ✓ | × | × | × |
| 32 | CSKc9  | UM17 | ✓ | ✓ | ✓ | ✓ | ✓ |
| 33 | CSKc10 |      | ✓ | ✓ | ✓ | × | × |
| 34 | CSKd1  |      | ✓ | ✓ | × | × | × |
| 35 | CSKd2  | UM18 | ✓ | ✓ | ✓ | ✓ | ✓ |
| 36 | CSKd3  | UM19 | ✓ | ✓ | ✓ | ✓ | × |
| 37 | CSKd4  | UM20 | ✓ | ✓ | ✓ | ✓ | ✓ |
| 38 | CSKd5  |      | ✓ | ✓ | × | × | × |
| 39 | CSKd6  |      | ✓ | ✓ | × | × | × |
| 40 | CSKd7  | UM21 | ✓ | ✓ | ✓ | ✓ | × |
| 41 | CSKd8  | UM22 | ✓ | ✓ | ✓ | ✓ | ✓ |
| 42 | CSKd9  |      | ✓ | ✓ | ✓ | × | × |
| 43 | CSKd10 | UM23 | ✓ | ✓ | ✓ | ✓ | ✓ |
| 44 | CSKd11 |      | ✓ | ✓ | × | × | × |
| 45 | TKRa1  | UM24 | ✓ | ✓ | ✓ | ✓ | ✓ |
| 46 | TKRa2  | UM25 | ✓ | ✓ | ✓ | ✓ | ✓ |
| 47 | TKRa3  |      | ✓ | ✓ | × | × | × |

|    |        |      |   |   |   |   |   |
|----|--------|------|---|---|---|---|---|
| 48 | TKRa4  |      | ✓ | ✓ | × | × | × |
| 49 | TKRa5  | UM26 | ✓ | ✓ | ✓ | ✓ | × |
| 50 | TKRa6  | UM27 | ✓ | ✓ | ✓ | ✓ | ✓ |
| 51 | TKRa7  | UM28 | ✓ | ✓ | ✓ | ✓ | ✓ |
| 52 | TKRa8  | UM29 | ✓ | ✓ | ✓ | ✓ | × |
| 53 | TKRa9  |      | ✓ | ✓ | ✓ | × | × |
| 54 | TKRa10 | UM30 | ✓ | ✓ | ✓ | ✓ | ✓ |
| 55 | TKRa11 |      | ✓ | ✓ | × | × | × |
| 56 | TKRa12 | UM31 | ✓ | ✓ | ✓ | ✓ | ✓ |
| 57 | TKRb1  |      | ✓ | ✓ | × | × | × |
| 58 | TKRb2  | UM32 | ✓ | ✓ | ✓ | ✓ | ✓ |
| 59 | TKRb3  | UM33 | ✓ | ✓ | ✓ | ✓ | × |
| 60 | TKRb4  |      | ✓ | ✓ | ✓ | × | × |
| 61 | TKRb5  |      | ✓ | ✓ | × | × | × |
| 62 | TKRb6  | UM34 | ✓ | ✓ | ✓ | ✓ | × |
| 63 | TKRb7  | UM35 | ✓ | ✓ | ✓ | ✓ | ✓ |
| 64 | TKRb8  | UM36 | ✓ | ✓ | ✓ | ✓ | ✓ |
| 65 | TKRb9  |      | ✓ | ✓ | × | × | × |
| 66 | TKRb10 | UM37 | ✓ | ✓ | ✓ | ✓ | ✓ |
| 67 | TKRb11 |      | ✓ | ✓ | × | × | × |
| 68 | LRa1   | UM38 | ✓ | ✓ | ✓ | ✓ | ✓ |
| 69 | LRa2   | UM39 | ✓ | ✓ | ✓ | ✓ | × |
| 70 | LRa3   |      | ✓ | ✓ | × | × | × |
| 71 | LRa4   | UM40 | ✓ | ✓ | ✓ | ✓ | ✓ |
| 72 | LRa5   |      | ✓ | ✓ | ✓ | × | × |
| 73 | LRa6   |      | ✓ | ✓ | × | × | × |
| 74 | LRa7   | UM41 | ✓ | ✓ | ✓ | ✓ | ✓ |



|     |       |      |   |   |   |   |   |
|-----|-------|------|---|---|---|---|---|
| 75  | LRa8  | UM42 | ✓ | ✓ | ✓ | ✓ | ✓ |
| 76  | LRa9  | UM43 | ✓ | ✓ | ✓ | ✓ | × |
| 77  | LRa10 |      | ✓ | ✓ | × | × | × |
| 78  | LRa11 | UM44 | ✓ | ✓ | ✓ | ✓ | × |
| 79  | LRb1  | UM45 | ✓ | ✓ | ✓ | ✓ | ✓ |
| 80  | LRb2  |      | ✓ | ✓ | ✓ | × | × |
| 81  | LRb3  | UM46 | ✓ | ✓ | ✓ | ✓ | ✓ |
| 82  | LRb4  |      | ✓ | ✓ | × | × | × |
| 83  | LRb5  |      | ✓ | ✓ | × | × | × |
| 84  | LRb6  | UM47 | ✓ | ✓ | ✓ | ✓ | ✓ |
| 85  | LRb7  | UM48 | ✓ | ✓ | ✓ | ✓ | ✓ |
| 86  | LRb8  |      | ✓ | ✓ | × | × | × |
| 87  | LRb9  | UM49 | ✓ | ✓ | ✓ | ✓ | × |
| 88  | LRb10 | UM50 | ✓ | ✓ | ✓ | ✓ | ✓ |
| 89  | LRb11 | UM51 | ✓ | ✓ | ✓ | ✓ | ✓ |
| 90  | LRb12 |      | ✓ | ✓ | × | × | × |
| 91  | LRb13 | UM52 | ✓ | ✓ | ✓ | ✓ | ✓ |
| 92  | LRb14 |      | ✓ | ✓ | × | × | × |
| 93  | LRb15 | UM53 | ✓ | ✓ | ✓ | ✓ | ✓ |
| 94  | LRb16 | UM54 | ✓ | ✓ | ✓ | ✓ | ✓ |
| 95  | LRc1  |      | ✓ | ✓ | × | × | × |
| 96  | LRc2  |      | ✓ | ✓ | × | × | × |
| 97  | LRc3  | UM55 | ✓ | ✓ | ✓ | ✓ | × |
| 98  | LRc4  |      | ✓ | ✓ | × | × | × |
| 99  | LRc5  | UM56 | ✓ | ✓ | ✓ | ✓ | ✓ |
| 100 | LRc6  | UM57 | ✓ | ✓ | ✓ | ✓ | ✓ |
| 101 | LRc7  | UM58 | ✓ | ✓ | ✓ | ✓ | ✓ |

|     |       |      |   |   |   |   |   |
|-----|-------|------|---|---|---|---|---|
| 102 | LRc8  |      | ✓ | ✓ | × | × | × |
| 103 | LRc9  |      | ✓ | ✓ | ✓ | × | × |
| 104 | LRc10 |      | ✓ | ✓ | ✓ | × | × |
| 105 | LRc11 | UM59 | ✓ | ✓ | ✓ | ✓ | × |
| 106 | LRc12 |      | ✓ | ✓ | × | × | × |
| 107 | LRc13 |      | ✓ | ✓ | × | × | × |
| 108 | LRc14 | UM60 | ✓ | ✓ | ✓ | ✓ | × |
| 109 | LRc15 | UM61 | ✓ | ✓ | ✓ | ✓ | ✓ |
| 110 | GPB1  |      | ✓ | ✓ | × | × | × |
| 111 | GPB2  | UM62 | ✓ | ✓ | ✓ | ✓ | ✓ |
| 112 | GPB3  | UM63 | ✓ | ✓ | ✓ | ✓ | × |
| 113 | GPB4  |      | ✓ | ✓ | × | × | × |
| 114 | GPB5  | UM64 | ✓ | ✓ | ✓ | ✓ | ✓ |
| 115 | GPB6  |      | ✓ | ✓ | × | × | × |
| 116 | GPB7  |      | ✓ | ✓ | ✓ | × | × |
| 117 | GPB8  | UM65 | ✓ | ✓ | ✓ | ✓ | ✓ |
| 118 | GPB9  | UM66 | ✓ | ✓ | ✓ | ✓ | ✓ |
| 119 | GPB10 | UM67 | ✓ | ✓ | ✓ | ✓ | × |
| 120 | GPB11 |      | ✓ | ✓ | × | × | × |
| 121 | GPB12 |      | ✓ | ✓ | ✓ | × | × |
| 122 | GPB13 | UM68 | ✓ | ✓ | ✓ | ✓ | × |
| 123 | GPB14 |      | ✓ | ✓ | × | × | × |
| 124 | GPB15 | UM69 | ✓ | ✓ | ✓ | ✓ | ✓ |
| 125 | GPB16 | UM70 | ✓ | ✓ | ✓ | ✓ | ✓ |
| 126 | GPB17 |      | ✓ | ✓ | × | × | × |
| 127 | GPB18 |      | ✓ | ✓ | ✓ | × | × |
| 128 | GPB19 | UM71 | ✓ | ✓ | ✓ | ✓ | × |

|     |       |      |   |   |   |   |   |
|-----|-------|------|---|---|---|---|---|
| 129 | GPB20 | UM72 | ✓ | ✓ | ✓ | ✓ | ✓ |
| 130 | GPB21 | UM73 | ✓ | ✓ | ✓ | ✓ | ✓ |
| 131 | BWC1  | UM74 | ✓ | ✓ | ✓ | ✓ | × |
| 132 | BWC2  |      | ✓ | ✓ | × | × | × |
| 133 | BWC3  |      | ✓ | ✓ | × | × | × |
| 134 | BWC4  | UM75 | ✓ | ✓ | ✓ | ✓ | ✓ |
| 135 | BWC5  | UM76 | ✓ | ✓ | ✓ | ✓ | ✓ |
| 136 | BWC6  |      | ✓ | ✓ | × | × | × |
| 137 | BWC7  | UM77 | ✓ | ✓ | ✓ | ✓ | × |
| 138 | BWC8  |      | ✓ | ✓ | × | × | × |
| 139 | BWC9  |      | ✓ | ✓ | ✓ | × | × |
| 140 | BWC10 |      | ✓ | ✓ | ✓ | × | × |
| 141 | BWC11 | UM78 | ✓ | ✓ | ✓ | ✓ | × |
| 142 | BWC12 |      | ✓ | ✓ | × | × | × |
| 143 | BWC13 | UM79 | ✓ | ✓ | ✓ | ✓ | ✓ |
| 144 | BWC14 |      | ✓ | ✓ | × | × | × |
| 145 | BWC15 | UM80 | ✓ | ✓ | ✓ | ✓ | ✓ |
| 146 | BWC16 | UM81 | ✓ | ✓ | ✓ | ✓ | ✓ |
| 147 | BWC17 |      | ✓ | ✓ | × | × | × |
| 148 | BWC18 |      | ✓ | ✓ | ✓ | × | × |
| 149 | BWC19 | UM82 | ✓ | ✓ | ✓ | ✓ | × |
| 150 | BWC20 |      | ✓ | ✓ | × | × | × |
| 151 | BWC21 |      | ✓ | ✓ | × | × | × |
| 152 | BWC22 | UM83 | ✓ | ✓ | ✓ | ✓ | ✓ |
| 153 | BWC23 | UM84 | ✓ | ✓ | ✓ | ✓ | × |
| 154 | TTS1  | UM85 | ✓ | ✓ | ✓ | ✓ | ✓ |
| 155 | TTS2  |      | ✓ | ✓ | ✓ | × | × |

|     |       |      |   |   |   |   |   |
|-----|-------|------|---|---|---|---|---|
| 156 | TTS3  |      | ✓ | ✓ | ✓ | × | × |
| 157 | TTS4  | UM86 | ✓ | ✓ | ✓ | ✓ | ✓ |
| 158 | TTS5  | UM87 | ✓ | ✓ | ✓ | ✓ | ✓ |
| 159 | TTS6  |      | ✓ | ✓ | × | × | × |
| 160 | TTS7  |      | ✓ | ✓ | × | × | × |
| 161 | TTS8  |      | ✓ | ✓ | × | × | × |
| 162 | TTS9  | UM88 | ✓ | ✓ | ✓ | ✓ | ✓ |
| 163 | TTS10 |      | ✓ | ✓ | × | × | × |
| 164 | TTS11 |      | ✓ | ✓ | × | × | × |
| 165 | TTS12 | UM89 | ✓ | ✓ | ✓ | ✓ | × |
| 166 | TTS13 | UM90 | ✓ | ✓ | ✓ | ✓ | ✓ |
| 167 | TTS14 | UM91 | ✓ | ✓ | ✓ | ✓ | ✓ |
| 168 | TTS15 | UM92 | ✓ | ✓ | ✓ | ✓ | × |
| 169 | TTS16 |      | ✓ | ✓ | ✓ | × | × |
| 170 | TTS17 |      | ✓ | ✓ | ✓ | × | × |
| 171 | TTS18 | UM93 | ✓ | ✓ | ✓ | ✓ | × |
| 172 | TTS19 |      | ✓ | ✓ | × | × | × |
| 173 | TTS20 | UM94 | ✓ | ✓ | ✓ | ✓ | ✓ |
| 174 | TTS21 |      | ✓ | ✓ | × | × | × |
| 175 | TTS22 |      | ✓ | ✓ | × | × | × |
| 176 | Dw1   | UM95 | ✓ | ✓ | ✓ | ✓ | ✓ |
| 177 | Dw2   | UM96 | ✓ | ✓ | ✓ | ✓ | ✓ |
| 178 | Dw3   | UM97 | ✓ | ✓ | ✓ | ✓ | × |
| 179 | Dw4   |      | ✓ | ✓ | × | × | × |
| 180 | Dw5   | UM98 | ✓ | ✓ | ✓ | ✓ | × |
| 181 | Dw6   |      | ✓ | ✓ | × | × | × |
| 182 | Dw7   | UM99 | ✓ | ✓ | ✓ | ✓ | ✓ |

|     |      |       |   |   |   |   |   |
|-----|------|-------|---|---|---|---|---|
| 183 | Dw8  | UM100 | ✓ | ✓ | ✓ | ✓ | × |
| 184 | Dw9  | UM101 | ✓ | ✓ | ✓ | ✓ | × |
| 185 | Dw10 | UM102 | ✓ | ✓ | ✓ | ✓ | ✓ |
| 186 | Dw11 |       | ✓ | ✓ | × | × | × |
| 187 | Dw12 |       | ✓ | ✓ | ✓ | × | × |
| 188 | Dw13 |       | ✓ | ✓ | × | × | × |
| 189 | Dw14 | UM103 | ✓ | ✓ | ✓ | ✓ | × |
| 190 | Dw15 | UM104 | ✓ | ✓ | ✓ | ✓ | ✓ |
| 191 | Dw16 |       | ✓ | ✓ | ✓ | × | × |
| 192 | Dw17 |       | ✓ | ✓ | ✓ | × | × |
| 193 | Dw18 | UM105 | ✓ | ✓ | ✓ | ✓ | ✓ |
| 194 | PA1  |       | ✓ | ✓ | × | × | × |
| 195 | PA2  |       | ✓ | ✓ | × | × | × |
| 196 | PA3  | UM106 | ✓ | ✓ | ✓ | ✓ | ✓ |
| 197 | PA4  | UM107 | ✓ | ✓ | ✓ | ✓ | × |
| 198 | PA5  | UM108 | ✓ | ✓ | ✓ | ✓ | ✓ |
| 199 | PA6  |       | ✓ | ✓ | × | × | × |
| 200 | PA7  | UM109 | ✓ | ✓ | ✓ | ✓ | × |
| 201 | PA8  | UM110 | ✓ | ✓ | ✓ | ✓ | ✓ |
| 202 | PA9  |       | ✓ | ✓ | × | × | × |
| 203 | PA10 | UM111 | ✓ | ✓ | ✓ | ✓ | ✓ |
| 204 | PA11 | UM112 | ✓ | ✓ | ✓ | ✓ | ✓ |
| 205 | PA12 | UM113 | ✓ | ✓ | ✓ | ✓ | × |
| 206 | PA13 |       | ✓ | ✓ | × | × | × |
| 207 | PA14 |       | ✓ | ✓ | × | × | × |
| 208 | PA15 | UM114 | ✓ | ✓ | ✓ | ✓ | × |
| 209 | PA16 |       | ✓ | ✓ | × | × | × |

|     |      |       |   |   |   |   |   |
|-----|------|-------|---|---|---|---|---|
| 210 | PA17 | UM115 | ✓ | ✓ | ✓ | ✓ | ✓ |
| 211 | PA18 |       | ✓ | ✓ | × | × | × |
| 212 | PA19 |       | ✓ | ✓ | × | × | × |
| 213 | PA20 |       | ✓ | ✓ | × | × | × |
| 214 | PA21 | UM116 | ✓ | ✓ | ✓ | ✓ | × |
| 215 | PA22 | UM117 | ✓ | ✓ | ✓ | ✓ | × |
| 216 | PA23 | UM118 | ✓ | ✓ | ✓ | ✓ | ✓ |
| 217 | PA24 | UM119 | ✓ | ✓ | ✓ | ✓ | ✓ |
| 218 | PA25 |       | ✓ | ✓ | × | × | × |
| 219 | PA26 |       | ✓ | ✓ | × | × | × |
| 220 | PA27 | UM120 | ✓ | ✓ | ✓ | ✓ | ✓ |
| 221 | PA28 | UM121 | ✓ | ✓ | ✓ | ✓ | × |
| 222 | PA29 |       | ✓ | ✓ | ✓ | × | × |
| 223 | PA30 |       | ✓ | ✓ | × | × | × |
| 224 | PA31 | UM122 | ✓ | ✓ | ✓ | ✓ | × |
| 225 | PA32 | UM123 | ✓ | ✓ | ✓ | ✓ | ✓ |
| 226 | PA33 | UM124 | ✓ | ✓ | ✓ | ✓ | × |
| 227 | PA34 |       | ✓ | ✓ | × | × | × |
| 228 | PA35 |       | ✓ | ✓ | ✓ | × | × |
| 229 | PA36 | UM125 | ✓ | ✓ | ✓ | ✓ | ✓ |
| 230 | PA37 | UM126 | ✓ | ✓ | ✓ | ✓ | ✓ |
| 231 | DLG1 | UM127 | ✓ | ✓ | ✓ | ✓ | × |
| 232 | DLG2 |       | ✓ | ✓ | × | × | × |
| 233 | DLG3 | UM128 | ✓ | ✓ | ✓ | ✓ | × |
| 234 | DLG4 |       | ✓ | ✓ | × | × | × |
| 235 | DLG5 | UM129 | ✓ | ✓ | ✓ | ✓ | ✓ |
| 236 | DLG6 | UM130 | ✓ | ✓ | ✓ | ✓ | ✓ |

|     |       |       |   |   |   |   |   |
|-----|-------|-------|---|---|---|---|---|
| 237 | DLG7  |       | ✓ | ✓ | ✓ | × | × |
| 238 | DLG8  | UM131 | ✓ | ✓ | ✓ | ✓ | × |
| 239 | DLG9  |       | ✓ | ✓ | × | × | × |
| 240 | DLG10 | UM132 | ✓ | ✓ | ✓ | ✓ | ✓ |
| 241 | DLG11 |       | ✓ | ✓ | × | × | × |
| 242 | DLG12 |       | ✓ | ✓ | ✓ | × | × |
| 243 | DLG13 |       | ✓ | ✓ | ✓ | ✓ | × |
| 244 | DLG14 | UM133 | ✓ | ✓ | ✓ | ✓ | ✓ |
| 245 | DLG15 |       | ✓ | ✓ | ✓ | ✓ | × |
| 246 | DLG16 |       | ✓ | ✓ | × | × | × |
| 247 | DLG17 | UM134 | ✓ | ✓ | ✓ | ✓ | ✓ |
| 248 | DLG18 |       | ✓ | ✓ | × | × | × |
| 249 | DLG19 | UM135 | ✓ | ✓ | ✓ | ✓ | ✓ |
| 250 | DLG20 | UM136 | ✓ | ✓ | ✓ | ✓ | ✓ |
| 251 | DLG21 |       | ✓ | ✓ | × | × | × |
| 252 | DLG22 |       | ✓ | ✓ | × | × | × |
| 253 | DLG23 | UM137 | ✓ | ✓ | ✓ | ✓ | ✓ |
| 254 | DLG24 |       | ✓ | ✓ | ✓ | × | × |
| 255 | DLG25 | UM138 | ✓ | ✓ | ✓ | ✓ | ✓ |
| 256 | DLG26 |       | ✓ | ✓ | × | × | × |
| 257 | DLG27 | UM139 | ✓ | ✓ | ✓ | ✓ | ✓ |
| 258 | DLG28 |       | ✓ | ✓ | ✓ | ✓ | × |
| 259 | DLG29 | UM140 | ✓ | ✓ | ✓ | ✓ | ✓ |
| 260 | DLG30 |       | ✓ | ✓ | ✓ | ✓ | × |
| 261 | DLG31 |       | ✓ | ✓ | ✓ | × | × |
| 262 | DLG32 |       | ✓ | ✓ | ✓ | ✓ | × |
| 263 | DLG33 |       | ✓ | ✓ | × | × | × |

|     |       |       |   |   |   |   |   |
|-----|-------|-------|---|---|---|---|---|
| 264 | DLG34 | UM141 | ✓ | ✓ | ✓ | ✓ | ✓ |
| 265 | BBD1  |       | ✓ | ✓ | × | × | × |
| 266 | BBD2  | UM142 | ✓ | ✓ | ✓ | ✓ | × |
| 267 | BBD3  | UM143 | ✓ | ✓ | ✓ | ✓ | ✓ |
| 268 | BBD4  | UM144 | ✓ | ✓ | ✓ | ✓ | ✓ |
| 269 | BBD5  |       | ✓ | ✓ | ✓ | × | × |
| 270 | BBD6  |       | ✓ | ✓ | × | × | × |
| 271 | BBD7  | UM145 | ✓ | ✓ | ✓ | ✓ | × |
| 272 | BBD8  | UM146 | ✓ | ✓ | ✓ | ✓ | × |
| 273 | BBD9  |       | ✓ | ✓ | × | × | × |
| 274 | BBD10 |       | ✓ | ✓ | ✓ | × | × |
| 275 | BBD11 | UM147 | ✓ | ✓ | ✓ | ✓ | × |
| 276 | BBD12 | UM148 | ✓ | ✓ | ✓ | ✓ | ✓ |
| 277 | BBD13 |       | ✓ | ✓ | × | × | × |
| 278 | BBD14 |       | ✓ | ✓ | × | × | × |
| 279 | BBD15 | UM149 | ✓ | ✓ | ✓ | ✓ | × |
| 280 | BBD16 | UM150 | ✓ | ✓ | ✓ | ✓ | ✓ |
| 281 | BBD17 |       | ✓ | ✓ | × | × | × |
| 282 | BBD18 | UM151 | ✓ | ✓ | ✓ | ✓ | ✓ |
| 283 | BBD19 | UM152 | ✓ | ✓ | ✓ | ✓ | ✓ |
| 284 | BBD20 | UM152 | ✓ | ✓ | ✓ | ✓ | × |
| 285 | BBD21 |       | ✓ | ✓ | ✓ | × | × |
| 286 | BBD22 |       | ✓ | ✓ | × | × | × |
| 287 | BBD23 | UM153 | ✓ | ✓ | ✓ | ✓ | ✓ |
| 288 | BBD24 | UM154 | ✓ | ✓ | ✓ | ✓ | × |
| 289 | BBD25 |       | ✓ | ✓ | × | × | × |
| 290 | BBD26 |       | ✓ | ✓ | × | × | × |



|     |       |       |   |   |   |   |   |
|-----|-------|-------|---|---|---|---|---|
| 291 | BBD27 | UM155 | ✓ | ✓ | ✓ | ✓ | ✓ |
| 292 | BBD28 | UM156 | ✓ | ✓ | ✓ | ✓ | ✓ |
| 293 | BBD29 | UM157 | ✓ | ✓ | ✓ | ✓ | × |
| 294 | BBD30 |       | ✓ | ✓ | × | × | × |
| 295 | BBD31 | UM158 | ✓ | ✓ | ✓ | ✓ | × |
| 296 | BBD32 |       | ✓ | ✓ | × | × | × |
| 297 | BBD33 | UM159 | ✓ | ✓ | ✓ | ✓ | ✓ |

**Supplementary Table 3: Detection for general plant growth promoting (PGP) characteristics and other selected biochemical activities associated directly or indirectly with PGP and bacterial adaptation under saline environment.**

| Sr. No. | Isolate Code | N <sub>2</sub> -fixation | P-solubilization     | IAA production | Siderophore production | Zn-solubilization   | EPS production                | HCN production | Catalase production | Peroxidase production | Cellulose degradation |
|---------|--------------|--------------------------|----------------------|----------------|------------------------|---------------------|-------------------------------|----------------|---------------------|-----------------------|-----------------------|
|         |              | NFM media                | Pikovas-kaya's media | L-tryptophan   | Chrome azrole S media  | Alexandrove's media | Culture supernatant + Ethanol |                |                     |                       | Starch Hydrolysis     |
| 1       | UM1          | -                        | -                    | -              | +                      | +                   | +                             | -              | +                   | +                     | -                     |
| 2       | UM2          | -                        | -                    | -              | -                      | -                   | +                             | -              | +                   | +                     | -                     |
| 3       | UM3          | +                        | -                    | -              | -                      | -                   | +                             | -              | +                   | +                     | -                     |
| 4       | UM4          | +                        | -                    | -              | -                      | -                   | +                             | -              | +                   | +                     | -                     |
| 5       | UM5          | -                        | -                    | -              | +                      | -                   | -                             | -              | +                   | +                     | +                     |
| 6       | UM6          | -                        | +                    | -              | -                      | -                   | -                             | -              | +                   | +                     | +                     |
| 7       | UM7          | -                        | -                    | -              | -                      | -                   | +                             | -              | +                   | -                     | -                     |
| 8       | UM8          | -                        | -                    | -              | -                      | +                   | +                             | -              | +                   | -                     | -                     |
| 9       | UM9          | -                        | -                    | -              | -                      | +                   | +                             | +              | +                   | +                     | -                     |
| 10      | UM10         | -                        | +                    | -              | +                      | -                   | +                             | -              | +                   | +                     | -                     |

|    |      |   |   |   |   |   |   |   |   |   |   |
|----|------|---|---|---|---|---|---|---|---|---|---|
| 11 | UM11 | - | - | - | - | - | - | - | + | + | - |
| 12 | UM12 | + | - | + | - | - | - | - | + | + | - |
| 13 | UM13 | + | - | - | - | - | - | - | + | - | + |
| 14 | UM14 | - | + | - | - | - | - | - | + | - | - |
| 15 | UM15 | - | - | - | - | - | + | + | + | - | - |
| 16 | UM16 | + | + | - | + | + | + | - | + | - | + |
| 17 | UM17 | + | - | - | - | - | - | - | + | + | + |
| 18 | UM18 | - | - | - | - | - | - | - |   | + | + |
| 19 | UM19 | - | + | - | - | - | + | - | + | + | + |
| 20 | UM20 | - | - | - | - | - | - | - | + | + | - |
| 21 | UM21 | + | - | - | + | - | - | - | + | + | - |
| 22 | UM22 | - | - | - | - | - | - | - | + | + | - |
| 23 | UM23 | - | - | - | - | - | + | - | + | - | - |
| 24 | UM24 | - | + | - | - | + | + | - | + | - | - |
| 25 | UM25 | - | - | - | - | + | + | - |   | - | - |
| 26 | UM26 | + | - | - | - | + | + | - | + | - | + |
| 27 | UM27 | - | - | - | + | - | + | - | + | + | - |
| 28 | UM28 | - | - | - | - | - | + | - | + | + | - |
| 29 | UM29 | - | - | - | - | - | - | - | + | + | - |
| 30 | UM30 | - | - | - | - | + | - | - | + | + | - |
| 31 | UM31 | + | - | - | - | - | - | - | + | + | - |
| 32 | UM32 | - | - | - | - | - | - | - | + | - | + |
| 33 | UM33 | - | + | - | - | - | + | - | + | - | - |
| 34 | UM34 | + | - | - | + | - | + | - | + | + | - |
| 35 | UM35 | - | - | - | - | - | - | - | + | + | - |
| 36 | UM36 | - | - | - | - | - | - | - | - | + | - |
| 37 | UM37 | - | - | + | - | - | - | + | - | + | - |

|    |      |   |   |   |   |   |   |   |   |   |   |
|----|------|---|---|---|---|---|---|---|---|---|---|
| 38 | UM38 | + | + | + | + | - | - | - | + | + | + |
| 39 | UM39 | + | - | - | - | - | - | - | + | + | - |
| 40 | UM40 | - | - | - | - | - | + | - | + | + | - |
| 41 | UM41 | - | + | - | - | - | + | - | + | + | - |
| 42 | UM42 | - | - | - | - | + | + | - | + | - | - |
| 43 | UM43 | - | - | - | - | - | - | - | + | - | + |
| 44 | UM44 | + | - | - | - | - | - | - | + | + | + |
| 45 | UM45 | - | + | - | - | - | - | + | + | + | - |
| 46 | UM46 | - | - | - | - | - | - | - | + | + | - |
| 47 | UM47 | - | - | - | - | - | - | - | - | + | - |
| 48 | UM48 | - | + | - | - | - | - | - | - | + | - |
| 49 | UM49 | - | - | - | - | + | + | - | + | + | - |
| 50 | UM50 | + | - | - | - | + | + | - | + | + | - |
| 51 | UM51 | - | - | - | + | - | + | - | + | + | + |
| 52 | UM52 | - | + | - | - | - | - | - | + | + | - |
| 53 | UM53 | - | - | - | - | - | - | - | + | + | - |
| 54 | UM54 | - | - | - | - | - | - | + | - | - | - |
| 55 | UM55 | + | - | - | - | - | - | - | + | - | - |
| 56 | UM56 | + | + | + | - | - | + | - | + | + | + |
| 57 | UM57 | + | - | - | - | - | + | - | + | + | - |
| 58 | UM58 | + | + | - | + | + | + | - | + | - | + |
| 59 | UM59 | - | + | - | + | - | - | - | + | + | - |
| 60 | UM60 | - | + | - | - | + | - | - | + | + | - |
| 61 | UM61 | - | - | - | - | + | - | - | - | + | - |
| 62 | UM62 | + | - | - | - | - | + | - | - | + | - |
| 63 | UM63 | - | - | - | - | - | - | - | + | + | - |
| 64 | UM64 | - | - | - | - | - | - | + | + | + | - |

|    |      |   |   |   |   |   |   |   |   |    |   |
|----|------|---|---|---|---|---|---|---|---|----|---|
| 65 | UM65 | + | - | - | - | - | + | - | + | +  | + |
| 66 | UM66 | - | + | - | - | - | + | - | + | +  | + |
| 67 | UM67 | - | - | - | - | - | - | - |   |    | + |
| 68 | UM68 | + | - | - | - | - | - | - | - | -  | - |
| 69 | UM69 | + | - | - | + | - | - | - |   | +  | - |
| 70 | UM70 | - | - | - | - | - | + | - | + | +  | - |
| 71 | UM71 | - | + | - | - | - | + | - | + | +  | - |
| 72 | UM72 | - | - | - | - | + | + | - | + | +  | - |
| 73 | UM73 | - | - | - | - | - | - | - | + | +  | - |
| 74 | UM74 | + | + | - | - | - | - | + | - | +  | - |
| 75 | UM75 | - | - | - | - | - | - | - | + | +  | - |
| 76 | UM76 | - | + | - | - | - | + | - | + | -  | + |
| 77 | UM77 | - | - | - | + | - | - | - | + | -  | - |
| 78 | UM78 | + | - | - | - | - | - | - | - | -  | - |
| 79 | UM79 | + | - | - | - | - | - | - | - | +  | - |
| 80 | UM80 | - | + | - | - | - | + | - | + | +  | - |
| 81 | UM81 | - | - | - | - | - | + | - | + | +  | - |
| 82 | UM82 | - | - | - | - | - | + | - | + | +  | - |
| 83 | UM83 | + | + | - | + | + | + | - | + | -S | + |
| 84 | UM84 | + | + | + | - | + | - | - | - | +  | - |
| 85 | UM85 | - | - | - | - | - | - | - | - | +  | - |
| 86 | UM86 | - | - | - | - | - | + | - | + | +  | - |
| 87 | UM87 | - | + | - | - | - | + | - | + | +  | - |
| 88 | UM88 | - | - | - | - | - | - | - | + | +  | - |
| 89 | UM89 | + | - | - | - | - | - | - | + | +  | - |
| 90 | UM90 | - | + | - | - | - | - | - | + | +  | - |
| 91 | UM91 | - | - | - | + | + | + | - | + | -  | - |

|     |       |   |   |   |   |   |   |   |   |   |   |
|-----|-------|---|---|---|---|---|---|---|---|---|---|
| 92  | UM92  | - | - | - | - | + | + | - | + | - | + |
| 93  | UM93  | + | + | - | - | - | + | - | + | - | + |
| 94  | UM94  | - | - | - | - | - | + | - | + | - | + |
| 95  | UM95  | - | + | - | - | - | - | + | - | + | - |
| 96  | UM96  | - | - | - | - | - | - | - | + | + | - |
| 97  | UM97  | + | - | - | + | - | + | - | + | + | - |
| 98  | UM98  | + | + | - | - | - | + | - | + | + | - |
| 99  | UM99  | + | - | - | - | - | + | - | + | + | - |
| 100 | UM100 | - | - | - | - | - | + | - | + | + | + |
| 101 | UM101 | - | + | - | - | + | - | + | + | + | + |
| 102 | UM102 | - | - | - | - | - | - | - | + | + | + |
| 103 | UM103 | + | - | - | + | - | - | - | + | + | + |
| 104 | UM104 | - | + | - | - | - | - | - | + | + | - |
| 105 | UM105 | - | - | - | - | - | - | - | + | + | - |
| 106 | UM106 | - | - | - | - | - | + | - | + | + | - |
| 107 | UM107 | - | - | - | - | - | + | - | + | + | - |
| 108 | UM108 | + | + | - | - | - | - | - | - | + | - |
| 109 | UM109 | + | - | - | - | - | - | - | + | + | + |
| 110 | UM110 | - | - | - | - | + | - | - | + | + | - |
| 111 | UM111 | - | + | - | + | - | + | - | + | - | - |
| 112 | UM112 | - | - | - | - | - | + | + | + | - | - |
| 113 | UM113 | + | - | - | - | - | + | - | + | + | - |
| 114 | UM114 | - | - | - | - | - | - | - | - | + | + |
| 115 | UM115 | - | + | - | - | - | - | - | - | + | + |
| 116 | UM116 | - | - | - | + | - | - | - | - | + | - |
| 117 | UM117 | + | - | - | + | + | + | - | + | + | - |
| 118 | UM118 | - | + | - | - | - | - | - | + | + | - |

|     |       |   |   |   |   |   |   |   |   |   |   |
|-----|-------|---|---|---|---|---|---|---|---|---|---|
| 119 | UM119 | - | - | - | - | - | - | - | + | + | - |
| 120 | UM120 | - | - | - | - | - | - | - | + | + | - |
| 121 | UM121 | + | + | - | - | - | + | - | + | + | + |
| 122 | UM122 | + | + | + | - | - | + | - | + | + | - |
| 123 | UM123 | - | + | - | - | - | + | + | + | - | - |
| 124 | UM124 | - | - | - | + | - | + | - | - | - | - |
| 125 | UM125 | - | - | - | - | - | - | - | - | + | - |
| 126 | UM126 | - | + | - | - | - | - | - | - | + | - |
| 127 | UM127 | + | - | - | - | + | + | - | - | + | - |
| 128 | UM128 | - | - | - | - | + | + | - | + | + | + |
| 129 | UM129 | - | + | - | - | - | + | - | + | + | + |
| 130 | UM130 | + | + | - | - | - | + | - | + | + | - |
| 131 | UM131 | - | - | - | - | - | - | + | + | - | - |
| 132 | UM132 | - | - | - | + | - | - | - | + | + | - |
| 133 | UM133 | - | - | - | - | - | - | - | - | + | - |
| 134 | UM134 | - | + | - | - | + | + | - | + | + | - |
| 135 | UM135 | + | - | - | - | - | + | - | + | + | - |
| 136 | UM136 | + | - | - | - | - | + | + | + | + | - |
| 137 | UM137 | - | - | - | - | + | + | - | + | + | + |
| 138 | UM138 | - | + | - | - | - | - | - | + | - | - |
| 139 | UM139 | - | - | - | - | - | - | - | + | + | - |
| 140 | UM140 | + | + | - | - | - | - | - | + | + | + |
| 141 | UM141 | - | - | - | + | - | + | + | + | + | - |
